# Supplementary material for: Revealing the promoting effect of Zn on Ni-based CO2hydrogenation catalysts
Source: Royal Society of Chemistry journal article supplement (doi:10.1039/d2ta10066e), 2023-01-01
Supplement: d2ta10066e1.pdf [file d2ta10066e1.pdf]

## Supporting Information

# Revealing the promoting effect of Zn on Ni-based CO<sub>2</sub> hydrogenation catalysts

Liang Shen, Wenhao Zhang, Yifei Feng, Jing Xu, Minghui Zhu\*

State Key Laboratory of Chemical Engineering, East China University of Science and  
Technology, 130 Meilong Road, Shanghai 200237, China

**Corresponding Email:** [minghuizhu@ecust.edu.cn](mailto:minghuizhu@ecust.edu.cn)

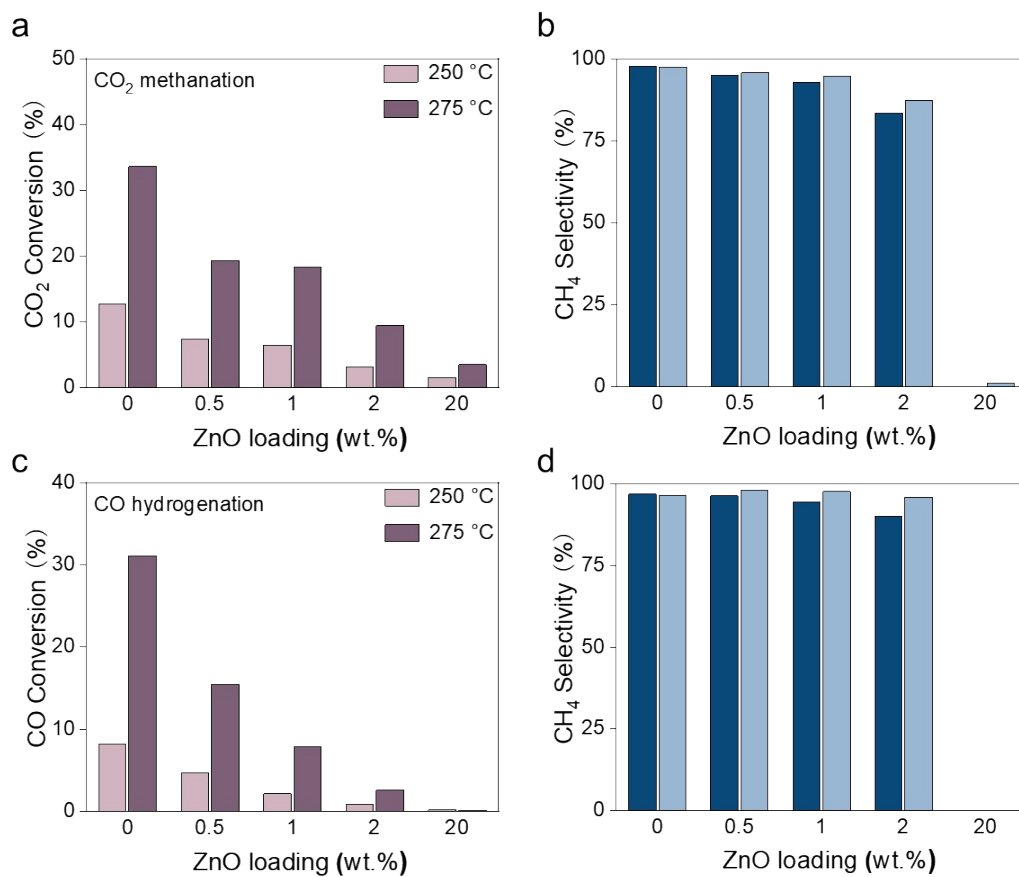

**Fig. S1** Catalytic performance of CO<sub>2</sub> and CO hydrogenation over NiZn/Al<sub>2</sub>O<sub>3</sub> catalysts

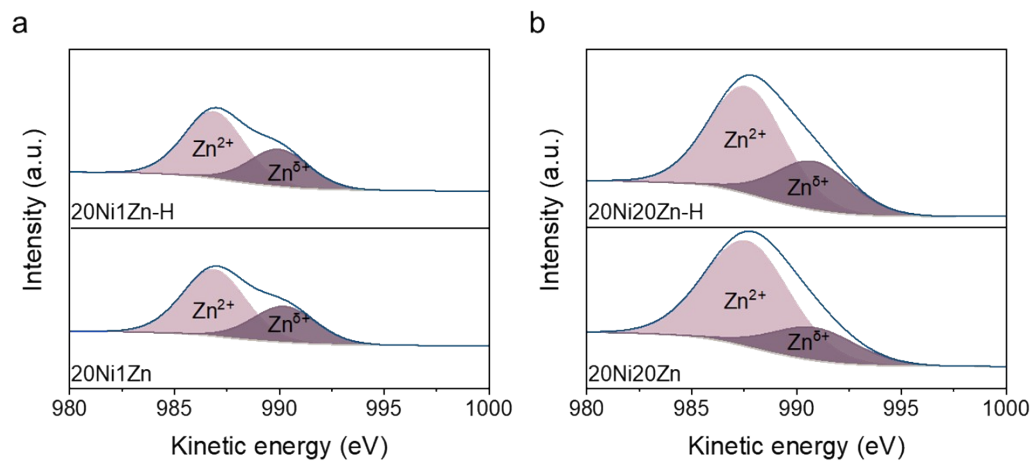

**Fig. S2** XPS spectra of Zn LMM for c) as-prepared and d) reduced catalysts

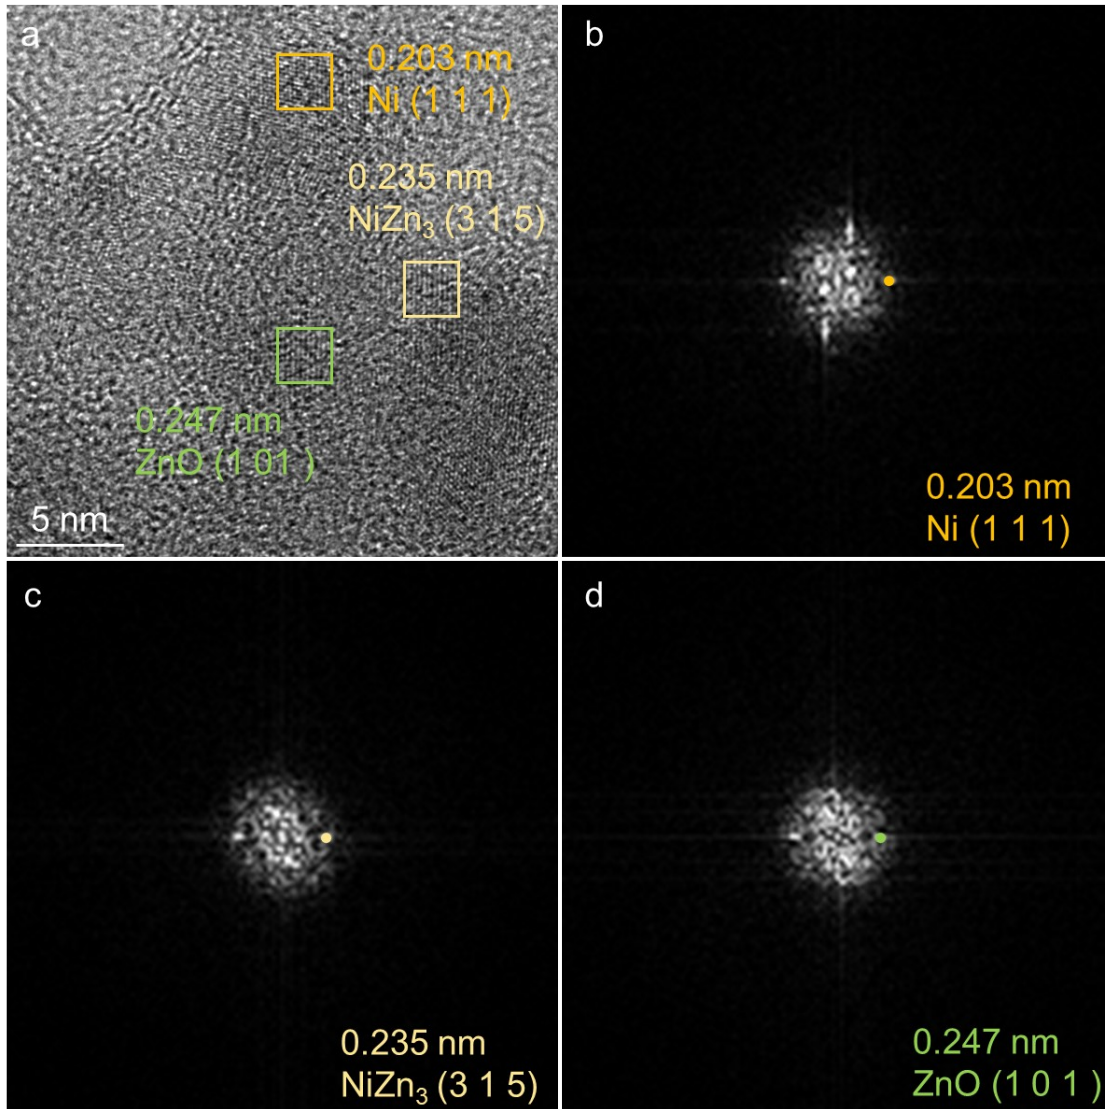

**Fig. S3** The FFT images of 20Ni1Zn-H

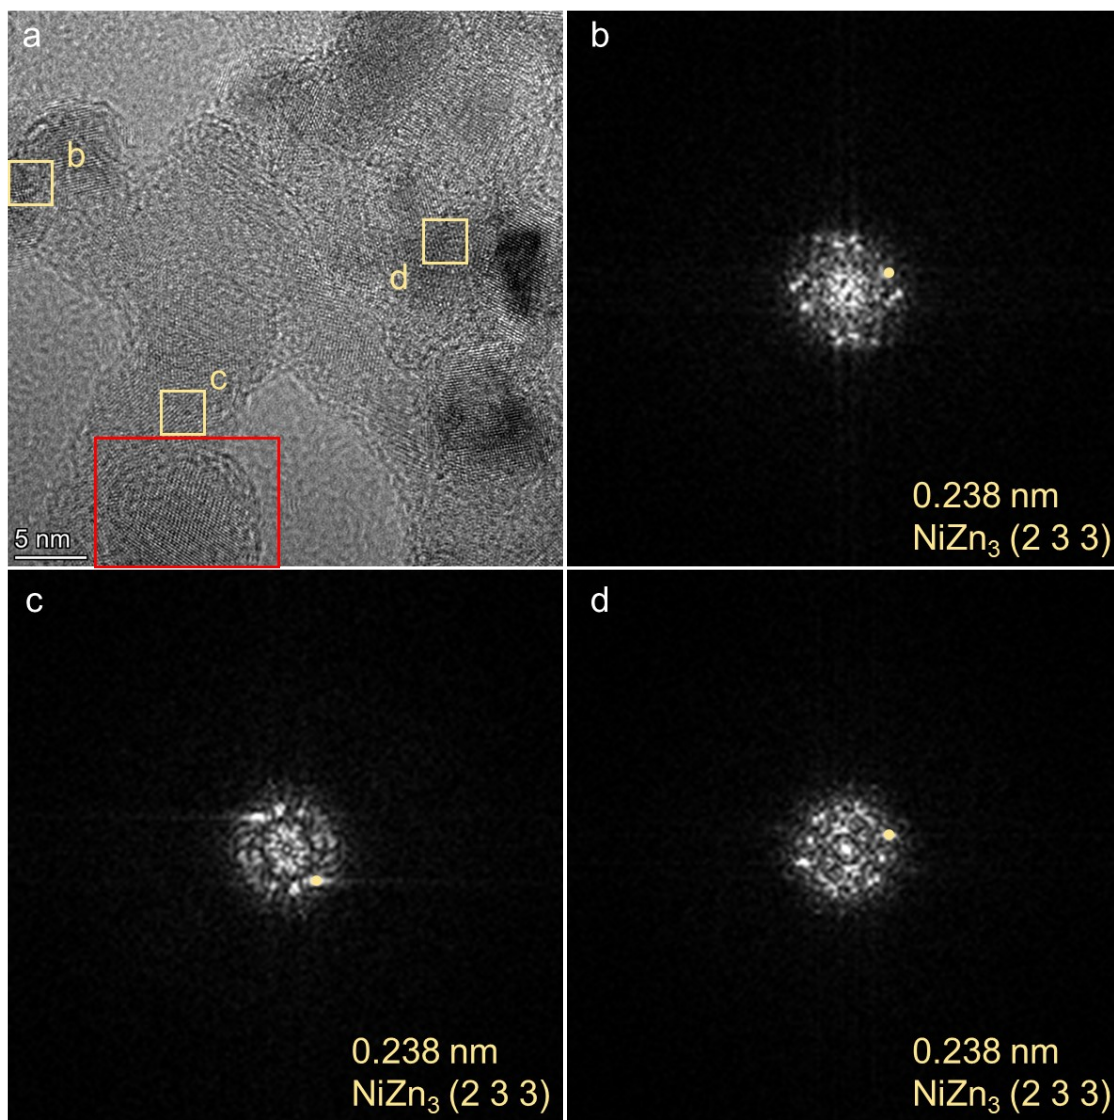

**Fig. S4** The FFT images of 20Ni20Zn-H

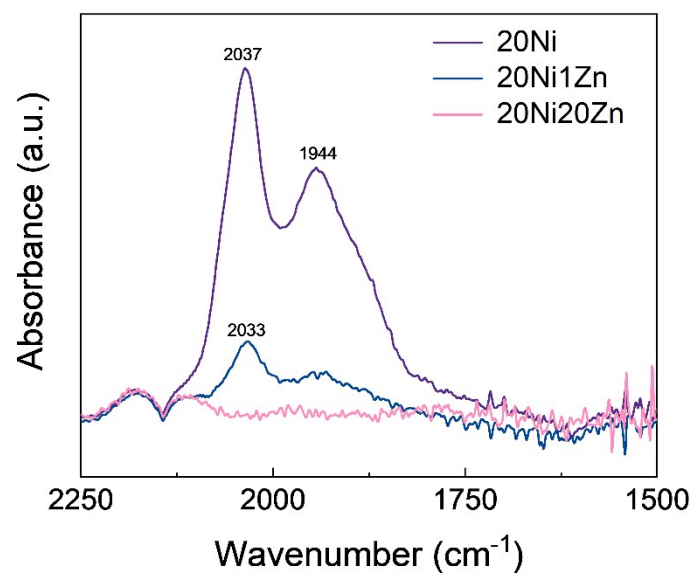

Fig. S5 CO-DRIFTS spectra of NiZn/Al<sub>2</sub>O<sub>3</sub> catalysts

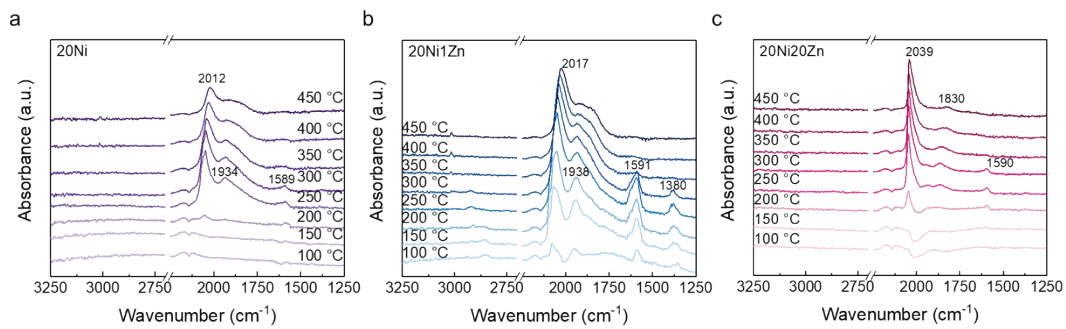

**Fig. S6** *In situ* DRIFTS spectra of NiZn/Al<sub>2</sub>O<sub>3</sub> catalysts during CO hydrogenation

In order to prove that the particle size effect was not the main reason for the selective regulation of NiZn/Al<sub>2</sub>O<sub>3</sub> catalysts, we first prepared Ni/Al<sub>2</sub>O<sub>3</sub> with 20 wt.% by the same method. Then we loaded the catalyst with different amounts of Zn, to ensure that Ni nanoparticles have nearly the same size. The results of the activity test in Fig. S4 show a similar pattern.

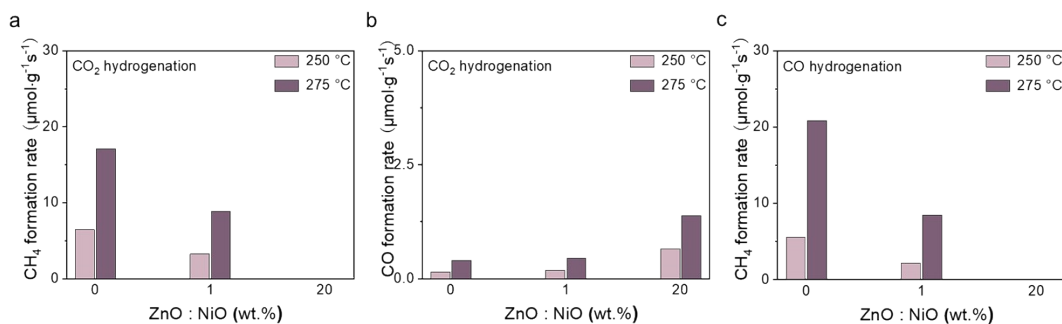

**Fig. S7** Catalytic performance of CO<sub>2</sub>/CO hydrogenation over ZnO-Ni/Al<sub>2</sub>O<sub>3</sub>

Catalysts



**Table S1.** Comparison of CO<sub>2</sub> conversion and CO selectivity for the catalysts

| Catalyst                           | H <sub>2</sub> :CO <sub>2</sub><br>ratio | Temperatur<br>e (°C) | CO <sub>2</sub> conversion<br>(%) | CO selectivity<br>(%) | Ref.      |
|------------------------------------|------------------------------------------|----------------------|-----------------------------------|-----------------------|-----------|
| 20Ni20Zn                           | 4:1                                      | 350/400              | 14.4/26.8                         | 95.5/83.4             | This work |
| CuO <sub>x</sub> /CeO <sub>2</sub> | 1:1                                      | 400                  | 9                                 | 100                   | 1         |
| Pd/SiO <sub>2</sub>                | 4:1                                      | 450                  | 40.8                              | 89.6                  | 2         |
| Fe <sub>3</sub> O <sub>4</sub>     | 1:1                                      | 480                  | 12.5                              | > 99                  | 3         |
| Fe film                            | 4:1                                      | 300                  | 2.2                               | ~80                   | 4         |
| Fe@graphite@C                      | 1:1                                      | 550                  | 30.2                              | >99                   | 5         |
| MoO <sub>2</sub> /FAU              | 1:1                                      | 500                  | 14.3                              | 99                    | 6         |

**Table S2.** Dispersion and turnover frequency of NiZn/Al<sub>2</sub>O<sub>3</sub> catalysts

| Catalyst | Dispersion (%) | TOF (s <sup>-1</sup> )        |                        |
|----------|----------------|-------------------------------|------------------------|
|          |                | CO <sub>2</sub> hydrogenation | CO hydrogenation       |
| 20Ni     | 14.27          | 15.59×10 <sup>-3</sup>        | 14.89×10 <sup>-3</sup> |
| 20Ni1Zn  | 8.15           | 14.79×10 <sup>-3</sup>        | 6.84×10 <sup>-3</sup>  |
| 20Ni20Zn | 5.93           | 3.80×10 <sup>-3</sup>         | 0.75×10 <sup>-3</sup>  |

**Table S3.** Surface chemical states of as-prepared/reduced catalysts based on XPS

analysis

| Catalyst | $Zn^{\delta+}/(Zn^{\delta+}+Zn^{2+})$ | $Zn^{\delta+}/(Zn^{\delta+}+Zn^{2+})$ | $Ni^0/(Ni^0+Ni^{\delta+})$ |
|----------|---------------------------------------|---------------------------------------|----------------------------|
|          | (%) <sup>a</sup>                      | (%) <sup>b</sup>                      | (%) <sup>b</sup>           |
| 20Ni     | /                                     | /                                     | 71.78                      |
| 20Ni1Zn  | 35.13                                 | 35.81                                 | 63.85                      |
| 20Ni20Zn | 23.78                                 | 31.54                                 | 57.12                      |

<sup>a</sup> as-prepared<sup>b</sup> reduced

## References

- 1 M. Ronda-Lloret, S. Rico-Francés, A. Sepúlveda-Escribano and E. V. Ramos-Fernandez, *Appl. Catal. A Gen.*, 2018, **562**, 28–36.
- 2 J. N. Park and E. W. McFarland, *J. Catal.*, 2009, **266**, 92–97.
- 3 Chou, Loiland and Lobo, *Catalysts*, 2019, **9**, 773.
- 4 H. Kierzkowska-Pawlak, M. Ryba, M. Fronczak, R. Kapica, J. Sielski, M. Sitarz, P. Zając, K. Łyszczarz and J. Tyczkowski, *Catalysts*, 2021, **11**, 883.
- 5 X. Zhao, Z. Wu, J. Fu, J. Guo and S. Kang, *ACS Appl. Mater. Interfaces*, 2021, **13**, 57100–57106.
- 6 A. Okemoto, M. R. Harada, T. Ishizaka, N. Hiyoshi and K. Sato, *Appl. Catal. A Gen.*, 2020, **592**, 117415.
